# Supplementary material
Source: publisher figshare collection journal article supplement (https://karger.figshare.com/articles/dataset/_/4743028)
Supplement: Supplementary file 3 [file 1]

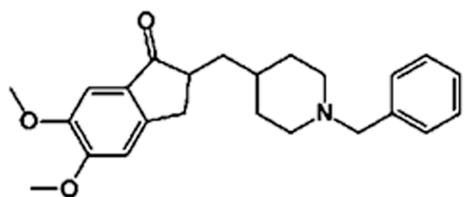

Donepezil

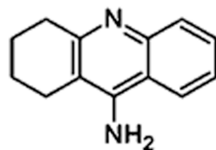

Tacrine

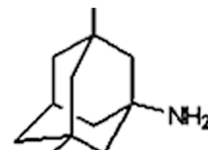

Memantine

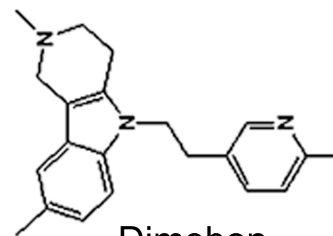

Dimebon

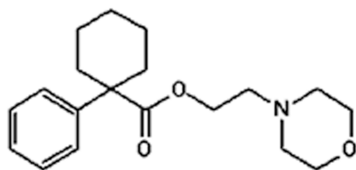

Pre084

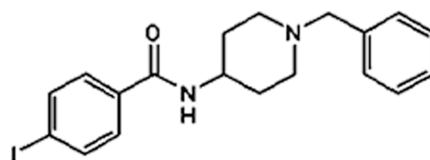

4-IBP

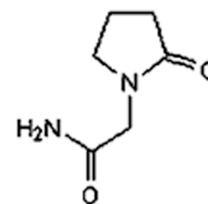

Piracetam

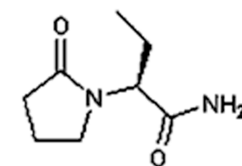

Levetiracetam

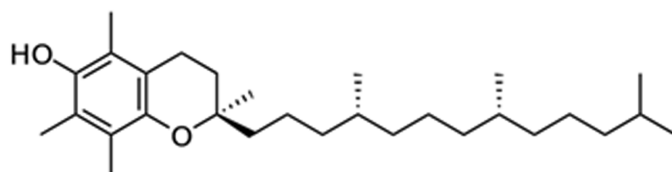

Vit E

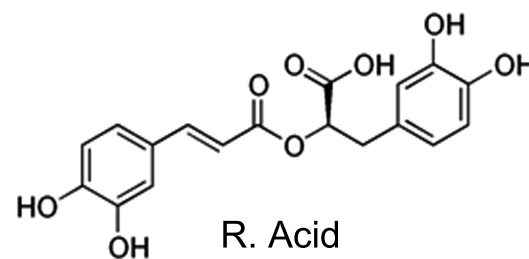

R. Acid

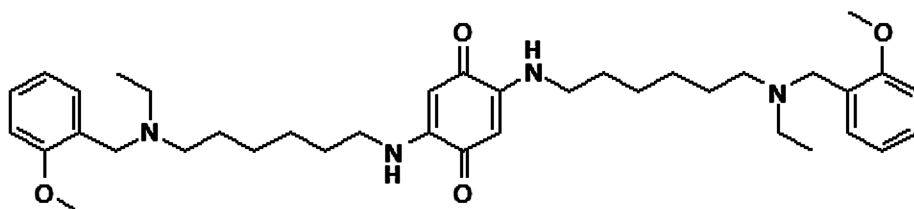

Memoquin

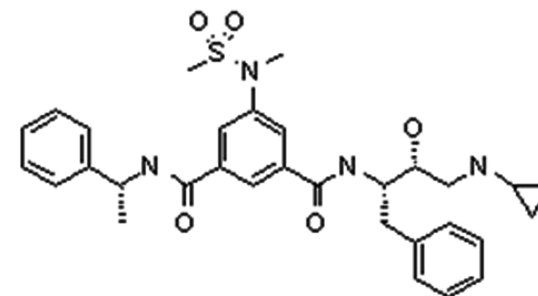

Merck BACE1 inhibitor
