# Supplementary material
Source: publisher figshare collection journal article supplement (https://karger.figshare.com/articles/dataset/_/4743028)
Supplement: Supplementary file 4 [file 1]

Archive with 4 entries (4 files):
- Koshibu Neuritogenesis Pharmacology Supp Methods revised -  Copy.docx
- Suppl Figure 1.pdf
- Suppl Figure 2.pdf
- Suppl Figure 3.pdf
