# Supplementary material
Source: publisher figshare collection journal article supplement (https://karger.figshare.com/articles/dataset/_/4743028)
Supplement: Supplementary file 4 [file 1 › Koshibu Neuritogenesis Pharmacology Supp Methods revised - Copy.docx]

1. **Supplementary Materials and Methods**
   1. ***Animals***

All experiments were approved by the ethical committee for animal experimentation at UCB in accordance with the European Directive 2010/63/EU and Belgian law for the use of animals for scientific purposes. All studies involving animals were reported in accordance with the ARRIVE guidelines for reporting experiments involving animals [[1](#_ENREF_1), [2](#_ENREF_2)]

- 1. ***Cell Culture***

Primary cortical cultures were prepared from rat embryos (E17 to 18). In brief, a pregnant Sprague Dawley rat (Charles River) was anesthetized with isoflurane then decapitated. Embryos were removed and their heads were collected in ice-cold DPBS without calcium or magnesium. Following, cortices were dissected in ice-cold DPBS under a dissection microscope. Three cortices were dissociated in 1ml of 0.25% trypsin (Invitrogen) in PBS for 20 minutes in a 37 ºC-cell culture incubator (95% O2/5% CO2). Trypsin was then inactivated by adding 14ml of serum-containing plating medium consisting of Neurobasal, 1% penicillin-streptomycin, 2% B27, 0.25% glutamax and 10% normal horse serum (Invitrogen; Lonza). The dissociated cells were then collected by centrifugation at 100xg, suspended in 1ml of plating medium using a 1ml- and a 200µl-pipette and the number of viable cells was counted using a cell viability analyzer (Vi-Cell XR, Beckman Coulter). The cells were diluted in plating medium without normal horse serum and plated at 5,000 cells/well in PDL-coated 96-well plates (Greiner).

- 1. ***Neurite Outgrowth Assay***

Two to three hours after plating, medium was removed and 50µl of fresh serum free plating medium was added per well. Fifty µl serum free plating medium containing 2x final concentration of compounds or vehicle (0.2% DMSO or H2O) was then added. The stocks of compounds were prepared to result in 0.1% DMSO at the final concentration per well. The cells were incubated in this condition in a 37 ºC-cell culture incubator (95% O2/5% CO2) for three days with no change of medium. At the end of three days, the compound or vehicle containing medium was removed, washed 1x with PBS, then fixed in 4% paraformaldehyde in PBS for one hour at room temperature. After fixation, cells were gently washed twice in PBS, incubated in a blocking buffer consisting of 5% fish serum (Invitrogen) for 1 hour at room temperature, then incubated in mouse anti-Tuj1 (class III β-tubulin) antibody (1:5000 dilution in blocking buffer; Covance) overnight at 4ºC. The following day, anti-Tuj1 antibody solution was removed and the cells were washed 3x with PBS (5 to 10min per wash), then incubated in rabbit anti-mouse Alexa 647 antibody (1:1000 dilution; Invitrogen) in blocking buffer for 2 to 3 hours at room temperature. The secondary antibody was removed and the cells were washed 3x with PBS (5 to 10min per wash). During the first PBS wash, DAPI (4',6-diamidino-2-phenylindole; 1:1000 dilution of the recommended stock by Invitrogen) was added to label the nucleus. The 3x3 montage images were automatically captured in two to three different locations within a well using Becton Dickinson Pathway 855. The compounds were purchased from Tocris except for vitamin E or tocopherol (SigmaAldrich), memoquin (UCB) and a BACE1 inhibitor by Merck (Axon Medchem). The structures of all compounds tested are summarized in Supplementary Figure 2.

To select the best assay condition, preliminary experiments were conducted to determine the optimal cell density and treatment regime. The optimal cell density was determined to be 5,000 cells/well in a PDL-coated 96-well plate from a range of 1,000 to 20,000 cells/well. The cell density below 5,000 cells/well caused cells to die from insufficient cell density and above 5,000 resulted in a high density culture that restricted accurate measurement of neurite outgrowth due to overlapping neurites. The optimal treatment regime was found to be initiating the compound treatments 2 to 3 hours after plating compared to 4 to 6 hour or 1 to 3 days after plating. We found that the effect of the compounds were most prominent when applied as early as possible after plating. Once the optimal start for accurately identifying individual neurites was determined, various end points from 1 to 5 days were tested. We found that the cells needed 3 days to optimally show the compound effect while 4 to 5 days resulted in a complex neurite network that prohibited accurate measurement of neurites. The condition was confirmed primarily with donepezil, which provided the most reliable neurite outgrowth in our culture system. During this set-up phase, the dose response of DMSO was also determined between the range of 0.05% to 1%. The result of these preliminary experiments indicated that the compound application at 2 to 3 hours after plating and termination of the treatment at 3 days provided the best and most accurate detection of changes in the neurite outgrowth. Furthermore, a DMSO concentration above 0.2% reduced the neurite outgrowth compared to no-DMSO controls, thus the concentration of DMSO was kept at 0.1% final concentration in our assay.

- 1. **Image Analysis**

Automated image analysis was performed using Definiens’ eCognition software. A custom image analysis solution was developed to first identify nuclei using the DAPI staining (Supplementary Figure 1). Classified nuclei were used to seed description of the soma and then to delineate neuronal processes based on the Tuj1 signal. The average neurite length and cell density were then calculated.

- 1. ***Statistics***

Statistical analyses of the raw data were conducted using ANOVA. For significant results (p<0.05), Dunnett *post-hoc* analysis was carried out to determine the significance at each concentration compared to the vehicle. Data were considered significant when p<0.05. All data are shown as mean ± SEM.

[1] Kilkenny C, Browne W, Cuthill IC, Emerson M, Altman DG, Group NCRRGW: Animal research: reporting in vivo experiments: the ARRIVE guidelines. *Br J Pharmacol* 2010, 160(7):1577-1579.

[2] McGrath JC, Drummond GB, McLachlan EM, Kilkenny C, Wainwright CL: Guidelines for reporting experiments involving animals: the ARRIVE guidelines. *Br J Pharmacol* 2010, 160(7):1573-1576.
