# Supplementary material
Source: publisher figshare collection journal article supplement (https://karger.figshare.com/articles/dataset/_/4743028)

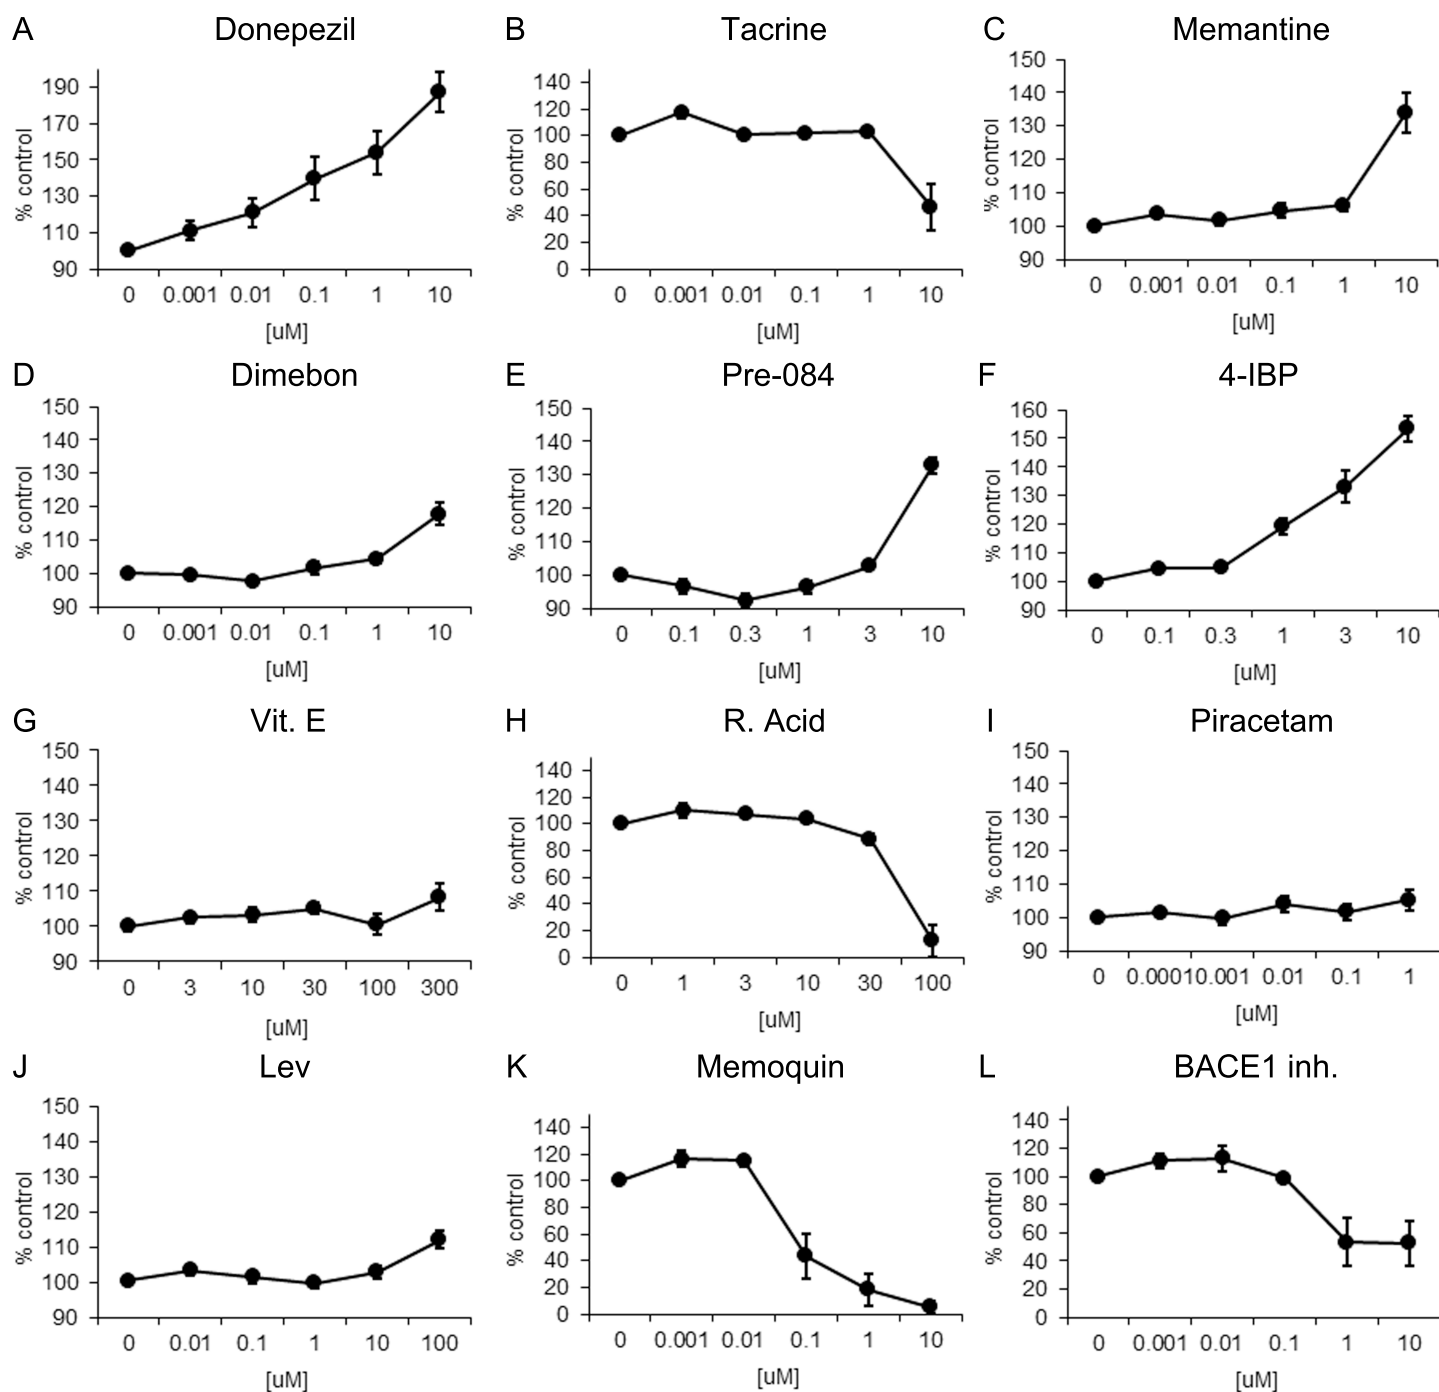

Supplemenatry Figure 3 (Page et al)

Supplement: Supplementary file 1 [file 1]

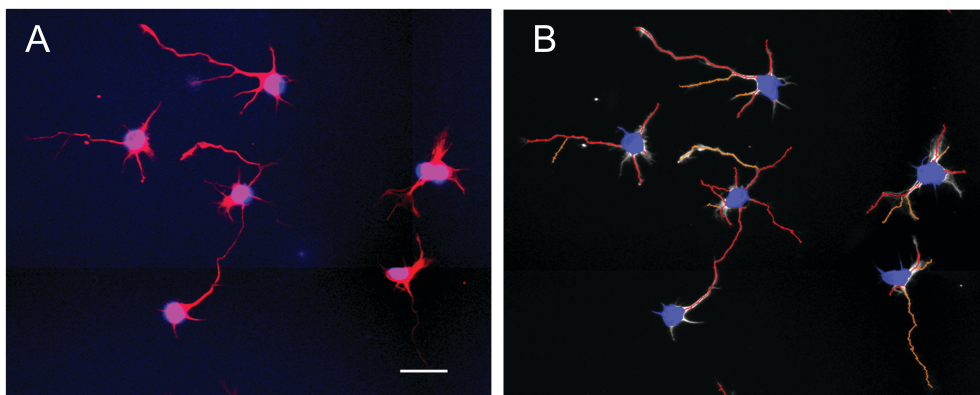

Supplementary Figure 2 (Page et al)

Supplement: Supplementary file 2 [file 1]
